# Supplementary material for: Social Determinants of Health and College Food Insecurity
Source: MDPI journal article supplement (doi:10.3390/nu16091391), 2024-05-04
Supplement: s1 [file s1]

**Social Determinants of Health and College Food Insecurity**

Supplementary Materials

## SDOH AND COLLEGE FOOD INSECURITY

Table S1. Mediation analysis of the effects of childhood food insecurity on health and well-being outcomes through college food insecurity using KHB method.

|                        | Food stress               | Difficulty concentrating<br>on studies | More food challenges<br>after COVID | General stress            | Self-rated<br>health         | Perceived<br>academic<br>progress |
|------------------------|---------------------------|----------------------------------------|-------------------------------------|---------------------------|------------------------------|-----------------------------------|
| Reduced (total effect) | 1.076**<br>[0.443, 1.709] | 1.957**<br>[0.905, 3.009]              | 0.722<br>[-0.053, 1.497]            | 0.733*<br>[0.115, 1.352]  | -0.924**<br>[-1.531, -0.317] | -0.333<br>[-0.997, 0.332]         |
| Full (direct effect)   | 0.491<br>[-0.146, 1.129]  | 1.357**<br>[0.327, 2.386]              | 0.493<br>[-0.292, 1.278]            | 0.481<br>[-0.146, 1.108]  | -0.711*<br>[-1.332, -0.091]  | -0.147<br>[-0.816, 0.522]         |
| Diff (indirect effect) | 0.585**<br>[0.246, 0.923] | 0.600**<br>[0.180, 1.020]              | 0.229*<br>[0.033, 0.424]            | 0.252**<br>[0.067, 0.438] | -0.213*<br>[-0.378, 0.047]   | -0.186*<br>[-0.343, -0.029]       |
| Mediation percent      | 54.34%                    | 30.66%                                 | 31.67%                              | 34.44%                    | 23.03%                       | 55.90%                            |

Note: Unstandardized regression coefficients are shown; 95% Confidence Intervals in brackets. All models controlled for gender, sexual orientation, race/ethnicity, off-campus living, instate, first-generation, and study area. \*\* p<0.01, \* p<0.05 (two-tailed test)

# SDOH AND COLLEGE FOOD INSECURITY

Table S2. P-values adjusted for multiple hypothesis testing correction compared to P-values from original models

|                                     | Food stress |         | Difficulty concentrating on studies |         | More food challenges after COVID |         | General stress |         | Self-rated health |         | Perceived academic progress |         |
|-------------------------------------|-------------|---------|-------------------------------------|---------|----------------------------------|---------|----------------|---------|-------------------|---------|-----------------------------|---------|
|                                     | Model 1     | Model 2 | Model 1                             | Model 2 | Model 1                          | Model 2 | Model 1        | Model 2 | Model 1           | Model 2 | Model 1                     | Model 2 |
|                                     |             |         |                                     |         |                                  |         |                |         |                   |         |                             |         |
| Childhood food insecurity           |             |         |                                     |         |                                  |         |                |         |                   |         |                             |         |
| Model p-value                       | 0.0028      | 0.1306  | 0.0009                              | 0.0098  | 0.0753                           | 0.2185  | 0.0240         | 0.1330  | 0.0019            | 0.0246  | 0.4178                      | 0.6673  |
| Romano-Wolf p-value                 | 0.0197      | 0.4197  | 0.0100                              | 0.0553  | 0.2027                           | 0.4197  | 0.0883         | 0.4197  | 0.0160            | 0.1077  | 0.4853                      | 0.6927  |
| College food insecurity             |             |         |                                     |         |                                  |         |                |         |                   |         |                             |         |
| Model p-value                       |             | 0.0000  |                                     | 0.0000  |                                  | 0.0034  |                | 0.0001  |                   | 0.0005  |                             | 0.0028  |
| Romano-Wolf p-value                 |             | 0.0003  |                                     | 0.0013  |                                  | 0.0077  |                | 0.0017  |                   | 0.0023  |                             | 0.0077  |
| Female                              |             |         |                                     |         |                                  |         |                |         |                   |         |                             |         |
| Model p-value                       | 0.8859      | 0.2090  | 0.7461                              | 0.8695  | 0.5968                           | 0.4621  | 0.0423         | 0.0201  | 0.0231            | 0.0096  | 0.4357                      | 0.5965  |
| Romano-Wolf p-value                 | 0.9434      | 0.6285  | 0.9434                              | 0.8880  | 0.9384                           | 0.8624  | 0.2166         | 0.1123  | 0.1603            | 0.0776  | 0.8897                      | 0.8624  |
| LGBTQIA++                           |             |         |                                     |         |                                  |         |                |         |                   |         |                             |         |
| Model p-value                       | 0.0280      | 0.0140  | 0.0901                              | 0.0463  | 0.0417                           | 0.0388  | 0.0036         | 0.0025  | 0.0001            | 0.0000  | 0.4437                      | 0.4765  |
| Romano-Wolf p-value                 | 0.1556      | 0.0863  | 0.2616                              | 0.1649  | 0.1743                           | 0.1649  | 0.0230         | 0.0173  | 0.0013            | 0.0003  | 0.4952                      | 0.5002  |
| Non-Hispanic black                  |             |         |                                     |         |                                  |         |                |         |                   |         |                             |         |
| Model p-value                       | 0.4959      | 0.9649  | 0.6069                              | 0.2502  | 0.4514                           | 0.6509  | 0.5104         | 0.7680  | 0.6863            | 0.8888  | 0.0445                      | 0.0781  |
| Romano-Wolf p-value                 | 0.8880      | 0.9840  | 0.8880                              | 0.6393  | 0.8880                           | 0.9737  | 0.8880         | 0.9827  | 0.8880            | 0.9840  | 0.1423                      | 0.2863  |
| Hispanic                            |             |         |                                     |         |                                  |         |                |         |                   |         |                             |         |
| Model p-value                       | 0.4429      | 0.8351  | 0.5184                              | 0.4777  | 0.2317                           | 0.2824  | 0.1497         | 0.2012  | 0.6551            | 0.7791  | 0.0821                      | 0.1239  |
| Romano-Wolf p-value                 | 0.8317      | 0.9517  | 0.8317                              | 0.8437  | 0.6684                           | 0.7334  | 0.5951         | 0.6831  | 0.8317            | 0.9517  | 0.4349                      | 0.5795  |
| Living off-campus                   |             |         |                                     |         |                                  |         |                |         |                   |         |                             |         |
| Model p-value                       | 0.0010      | 0.0123  | 0.0990                              | 0.2983  | 0.4538                           | 0.6283  | 0.3881         | 0.7684  | 0.4085            | 0.6477  | 0.3428                      | 0.5805  |
| Romano-Wolf p-value                 | 0.0060      | 0.0780  | 0.4412                              | 0.8537  | 0.8277                           | 0.9690  | 0.8277         | 0.9690  | 0.8277            | 0.9690  | 0.8277                      | 0.9690  |
| Humanities/behavioral/social/health |             |         |                                     |         |                                  |         |                |         |                   |         |                             |         |
| Model p-value                       | 0.2319      | 0.8441  | 0.8163                              | 0.7270  | 0.9368                           | 0.6632  | 0.6960         | 0.3448  | 0.8423            | 0.5984  | 0.0592                      | 0.0195  |
| Romano-Wolf p-value                 | 0.7348      | 0.9793  | 0.9957                              | 0.9793  | 0.9957                           | 0.9793  | 0.9900         | 0.8950  | 0.9957            | 0.9793  | 0.3336                      | 0.1373  |
| Business                            |             |         |                                     |         |                                  |         |                |         |                   |         |                             |         |
| Model p-value                       | 0.5430      | 0.8194  | 0.6913                              | 0.8326  | 0.4793                           | 0.4853  | 0.7111         | 0.6128  | 0.2349            | 0.2239  | 0.0705                      | 0.0726  |
| Romano-Wolf p-value                 | 0.9357      | 0.9680  | 0.9357                              | 0.9680  | 0.9357                           | 0.9284  | 0.9357         | 0.9484  | 0.7473            | 0.7338  | 0.3583                      | 0.3972  |

Notes: Model p-values from original regressions and Romano-Wolf stepdown adjusted p-values are shown. The regression models estimated for this table are the same as those for Table 3 and Table 4. Only variables that have a significant effect on at least one outcome are shown in the table.
